# Supplementary material for: An experimental electron density study on “1-zirconacyclopent-3-yne”
Source: Royal Society of Chemistry journal article supplement (doi:10.1039/b516229g), 2006-01-01
Supplement: b516229g.pdf [file b516229g.pdf]

## Experimental

### Data collection and refinements

A single crystal of **1**,  $0.20 \times 0.15 \times 0.11$  mm, was selected for measurement. Diffraction data were collected on an automated CCD diffractometer, Rigaku AFC-8 Mercury, on PF-AR NW2 beam line at KEK using  $0.7000 \text{ \AA}$  radiation with an oscillation method at 106K. Bragg spots on the imaging plates were integrated up to  $\sin\theta / \lambda = 0.97 \text{ \AA}^{-1}$ , and scaled with the program HKL2000.<sup>1</sup> Measured and independent reflections,  $R_{\text{int}}$  and completeness were 124265, 22754, 0.0401 and 0.915, respectively.

The reported structure<sup>2</sup> was used as an initial model. Anomalous scattering factors and X-ray absorption coefficients were taken from references 3 and 4, respectively. Following the refinements, high order refinements were carried out using all 9818 independent reflections with  $\sin\theta/\lambda \geq 0.60 \text{ \AA}^{-1}$  with the program SHELXL97.<sup>5</sup> Positions of hydrogen atoms were constrained to have C–H distances of 1.092, 1.083 and 1.059  $\text{\AA}$  for methylene, aromatic and methyl groups, respectively.<sup>6</sup> Refinements of multipole expansion method using the Hansen-Coppens multipole formalism<sup>7</sup> and topological analyses based on resulted parameters were performed with the XD package.<sup>8</sup> Refinement was carried out against 6915 independent reflections of  $\sin\theta/\lambda \leq 0.8 \text{ \AA}^{-1}$  with  $I > 3\sigma(I)$  based on  $F^2$ . At the first stage of the refinements, atomic coordinates and  $U_{ij}$  of non-hydrogen atoms were fixed on those of the high order refinement, and  $U_{\text{iso}}$  of hydrogen atoms were fixed on  $1.2U_{\text{eq}}$  and  $1.5U_{\text{eq}}$  of each parent C atom for methylene and aromatic, and methyl groups, respectively. At the first stage of the refinements, the population parameters,  $P_v$ ,  $P_{lm\pm}$  of non-hydrogen atoms and scale were refined. Levels of multipoles were raised stepwise up to hexadecapole and octupole for Zr and C atoms, respectively. On the refinements of the population parameters were constrained by assuming the molecular  $C_2$  symmetry. At the second stage, radial screening parameters,  $\kappa$  and  $\kappa'$  for non-hydrogen and hydrogen atoms were refined. At the third stage, the levels of multipoles were raised stepwise up to hexadecapole, octupole and dipole along the bond for Zr, C and H atoms, respectively. After those refinements, the second and third strategies were repeated twice and finally the  $P_v$ ,  $P_{lm\pm}$ ,  $\kappa$ ,  $\kappa'$ , coordinates of the non-hydrogen atoms and temperature factors and scale were refined. The positions of the H atoms were constrained to have C–H distances of 1.092, 1.083 and 1.059  $\text{\AA}$  for methylene, aromatic and methyl groups, respectively. The number of parameters in the final cycle of the refinements was 425. A molecule electro-neutrality constraint was applied all through the refinements.

### References

- (1) Z. Otwinoski and W. Minor, *Methods in Enzymol.* 1997, **276**, 307-326.
- (2) N. Suzuki, N. Aihara, H. Takahara, T. Watanabe, M. Iwasaki, M. Saburi, D. Hashizume and T. Chihara, *J. Am. Chem. Soc.*, 2004, **126**, 60-61.
- (3) S. Sasaki, *KEK Report*, 1989, **88-14**, 1-136.
- (4) Berger, M. J.; Hubbell, J. H.; Seltzer, J. S.; Coursey, J. S.; Zucker, D. S. XCOM: Photon Cross Section Database. National Institute of Standards and Technology, Gaithersburg, MD, U.S.A., 1999.
- (5) Sheldrick, G. M. SHELXL97, University of Göttingen, Germany, 1997.
- (6) *International Tables for Crystallography*, Vol. C, edited by Wilson, A. J. C. 1992, Kluwer Academic Publishers, Dordrecht.
- (7) Hansen, N. K.; Coppens, P. *Acta Crystallogr. Sect. A*, 1978, **34**, 909.
- (8) Koritsanszky, T.; Richter, T.; Macchi, P.; Volkov, A.; Gatti, C.; Howard, S.; Mallinson, P. R.; Farrugia, L.; Su, Z.; Hansen, N. K., XD – *Computer Program Package for Multipole Refinement and Topological Analysis of Electron Densities from Diffraction Data*, 2003.
